# Supplementary material
Source: publisher site journal article supplement (https://www.dovepress.com/article/372447)
Supplement: Supplementary file 1 [file get_supplementary_file.php]

**Table S1** Univariable logistic regression analysis to indicate OSA

| Variables | *β* | Wald | Odds ratio | 95%CI | *P* |
| --- | --- | --- | --- | --- | --- |
| Age | 0.044 | 22.298 | 1.045 | 1.026-1.064 | <0.001 |
| Male | 0.274 | 0.942 | 0.761 | 0.438-1.322 | 0.332 |
| BMI | 0.065 | 4.982 | 1.067 | 1.008-1.130 | 0.026 |
| Smoke | 0.576 | 2.116 | 1.779 | 0.799-3.824 | 0.146 |
| ESS | 0.034 | 0.458 | 1.034 | 0.938-1.141 | 0.499 |
| SBP | 0.021 | 9.148 | 1.022 | 1.008-1.036 | 0.002 |
| DBP | 0.027 | 5.274 | 1.028 | 1.004-1.052 | 0.022 |
| Daily SpO2 (%) | 0.042 | 1.615 | 1.043 | 0.977-1.114 | 0.204 |
| Hypertension: | 1.506 | 18.920 | 0.222 | 0.113-0.437 | 0.222 |
| Diabetes: | 1.121 | 6.143 | 0.326 | 0.134-0.791 | 0.013 |
| Hyperlipidemia: | 1.333 | 7.906 | 3.793 | 1.498-9.607 | 0.005 |
| Hemaglobin | -0.009 | 2.724 | 0.991 | 0.981-1.002 | 0.099 |
| Creatinine | 0.005 | 0.498 | 1.005 | 0.991-1.020 | 0.480 |
| Albumin | -0.018 | 0.645 | 0.982 | 0.938-1.027 | 0.422 |
| Triglyceride | 0.234 | 1.635 | 1.264 | 0.883-1.809 | 0.201 |
| TC | 0.097 | 0.525 | 1.102 | 0.847-1.435 | 0.469 |
| HDL | -0.186 | 0.237 | 0.830 | 0.393-1.756 | 0.627 |
| Lp(a) | -0.001 | 1.239 | 0.999 | 0.998-1.000 | 0.266 |
| ApoA1 | 0.010 | 0.120 | 1.010 | 0953-1.071 | 0.729 |
| ApoB | 0.320 | 0.355 | 1.378 | 0.480-3.950 | 0.551 |
| NT-proBNP | 0.000 | 0.002 | 1.000 | 1.000-1.000 | 0.966 |
| CK | 0.002 | 0.004 | 1.002 | 0.935-1.075 | 0.950 |
| UA | 0.002 | 2.989 | 1.002 | 1.000-1.004 | 0.084 |
| Hematocrit | 0.015 | 1.291 | 1.015 | 0.989-1.042 | 0.256 |
| Glucose | 0.226 | 6.855 | 1.253 | 1.058-1.484 | 0.009 |
| HbA1c | 0.827 | 13.913 | 2.287 | 1.481-3.532 | <0.001 |
| IL-6 | 0.018 | 2.089 | 1.018 | 0.994-1.043 | 0.148 |
| IL-8 | 0.000 | 0.003 | 1.000 | 0.995-1.005 | 0.957 |
| TNF-α | -0.001 | 0.003 | 0.999 | 0.954-1.046 | 0.957 |
| CRP | 0.035 | 1.526 | 1.035 | 0.980-1.094 | 0.217 |
| Homocysteine | 0.027 | 1.978 | 1.027 | 0.990-1.066 | 0.160 |

**Abbreviation:** ApoA1, Apolipoprotein A1; ApoB, Apolipoprotein B; BMI, body mass index; CRP, C-reactive protein; DBP, diastolic blood pressure; ESS, Epworth Sleepiness Scale; HbAlc, glycated hemoglobin; HDL, high-density lipoprotein; Lp(a), lipoprotein a; IL-6, Interleukin-6; IL-8, Interleukin-8; LDL, low density lipoprotein; NT-proBNP, N-terminal pro-B-type natriuretic peptide; OSA, obstructive sleep apnea; SBP, systolic blood pressure; SpO2, oxygen saturation by pulse oximetry; TC, total cholesterol; TNF-α, tumor necrosis factor-α; UA, uric acid.
